# Supplementary material for: Accelerated maximum likelihood parameter estimation for stochastic biochemical systems
Source: Springer Nature journal article supplement (doi:10.1186/1471-2105-13-68), 2012-05-01

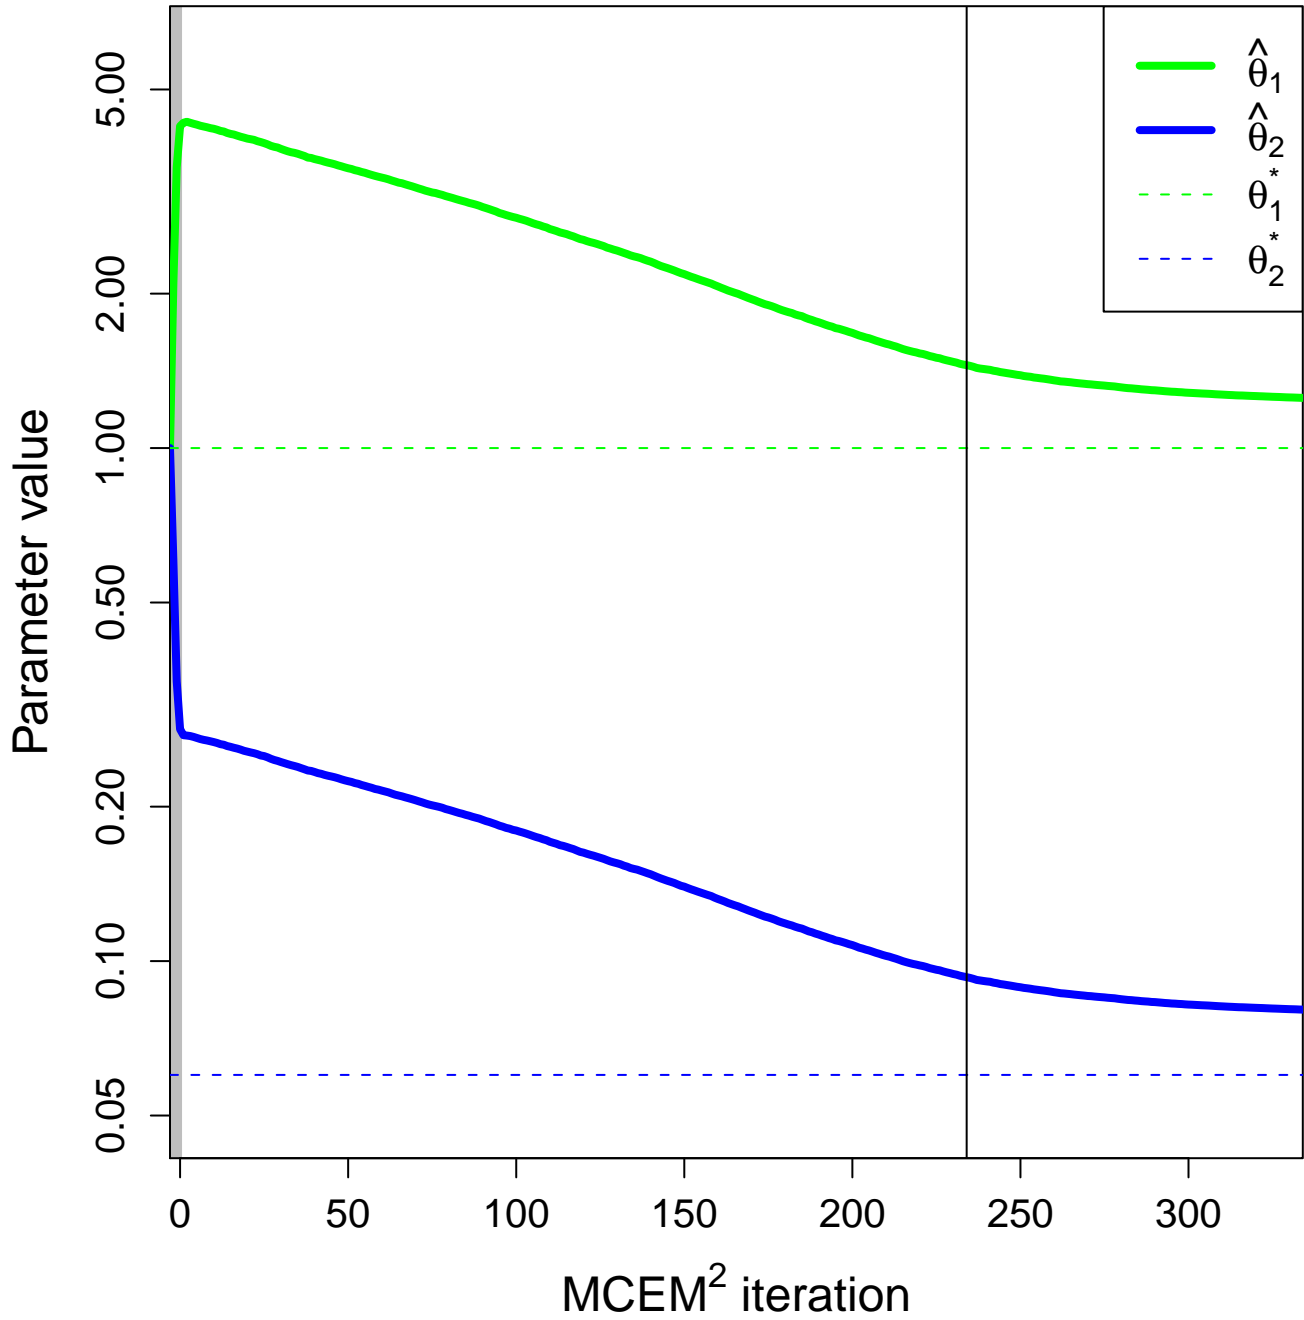

Supplement: 12859_2011_5434_MOESM4_ESM.pdf [file 12859_2011_5434_MOESM4_ESM.pdf]
